# Supplementary material
Source: bioRxiv or medRxiv preprint supplement (https://www.biorxiv.org/highwire/filestream/58382/field_highwire_adjunct_files/0/192500-1.pdf)
Supplement: Supplementary file [file 192500-1.pdf]

## Supporting Information

**Title:** Molecular basis for the maintenance of lipid asymmetry in the outer membrane of *Escherichia coli*

**Authors:** Jiang Yeow<sup>a,b,1</sup>, Kang Wei Tan<sup>a,1</sup>, Daniel A. Holdbrook<sup>c,1</sup>, Zhi-Soon Chong<sup>a</sup>, Jan K. Marzinek<sup>c,d</sup>, Peter J. Bond<sup>c,d,\*</sup>, Shu-Sin Chng<sup>a,e,\*</sup>

### Affiliations:

<sup>a</sup>Department of Chemistry, National University of Singapore, Singapore 117543.

<sup>b</sup>National University of Singapore Graduate School for Integrative Sciences and Engineering (NGS), Singapore 117456.

<sup>c</sup>Bioinformatics Institute, Agency for Science, Technology, and Research (A\*STAR), Singapore 138671.

<sup>d</sup>Department of Biological Sciences, National University of Singapore, Singapore 117543.

<sup>e</sup>Singapore Center for Environmental Life Sciences Engineering, National University of Singapore (SCELSE-NUS), Singapore 117456.

<sup>1</sup>These authors contributed equally to this work.

\*To whom correspondence should be addressed. E-mail: [chmchngs@nus.edu.sg](mailto:chmchngs@nus.edu.sg), [peterjb@bii.a-star.edu.sg](mailto:peterjb@bii.a-star.edu.sg)

## Supplementary Materials and Methods

**Bacterial strains and plasmids.** All strains and plasmids used are listed in Table S1 and S2, respectively.

**Growth conditions.** Luria Bertani (LB) broth and agar were prepared as described previously (1). Unless otherwise noted, ampicillin (Amp) (Sigma-Aldrich, MO, USA) was used at a concentration of 200 µg/mL, chloramphenicol (Cam) (Alfa Aesar, Heysham, UK) at 15 µg/mL, kanamycin (Kan) (Sigma-Aldrich) at 25 µg/mL, and spectinomycin (Spec) (Sigma-Aldrich) at 50 µg/mL. For crosslinking experiments, *para*-Benzoyl-L-phenylalanine (*p*Bpa; Alfa Aesar) was dissolved in 1 M NaOH at 0.25 M, and used at 0.25 mM unless otherwise mentioned.

**Plasmid construction.** To construct most plasmids, the desired gene or DNA fragments were amplified by PCR from the DNA template using primers listed in Table S3. Amplified fragments were digested with relevant restriction enzymes (New England Biolabs) and ligated into the same sites of an appropriate plasmids using T4 DNA ligase (New England Biolabs). NovaBlue competent cells were transformed with the ligation products and selected on LB plates containing appropriate antibiotics. All constructs were verified by DNA sequencing (Axil Scientific, Singapore).

**Construction of chromosomal *ompC* mutants using negative selection.** All chromosomal *ompC* mutations were introduced via a positive-negative selection method described previously (2). To prepare electro-competent cells, strain MC4100 harbouring pKM208 (3) grown overnight at 30 °C was inoculated into 15 mL SOB broth with 1:100 dilution. Cells were grown at the same temperature until OD<sub>600</sub> reached ~0.3-0.4. 1 mM of IPTG was added and the culture was grown for another 60 min at 30 °C. Cells were then subjected to heat

shock at 42 °C for 15 min, followed by incubation for 15 min on ice, with intermittent agitation. Subsequently, cells were centrifuged at 5000 x g for 10 min and made competent by washing twice with prechilled sterile water followed by cold 10 % glycerol. Competent cells were pelleted and resuspended in cold 10 % glycerol. For positive selection, 1 µg *kan-PrhaB-tse2* cassette amplified from pSLC-246 (2) using ompC\_NS\_N5 and ompC\_NS\_C3 primer pairs was transformed into the competent cells using 1-mm electroporation cuvettes (Biorad) in Eppendorf Eporator<sup>®</sup> (Eppendorf) with an output voltage of 1800 V. Cells were recovered in LB with 2 % glucose at 37 °C for at least 4 h, plated onto LB plates supplemented with Kan and 2 % glucose, and incubated at 37 °C for 24 h. For negative selection, 1 µg PCR product of *ompC* wild-type or mutant constructs amplified using ompC\_NS\_N5\_C and ompC\_NS\_C3\_C primer pairs were transformed into competent cells made from positive selection using similar procedures. After transformation, cells were plated onto minimal (M9) plates supplemented with 0.2 % rhamnose, and incubated for 48 h at 37 °C. Surviving colonies were PCR screened and verified by DNA sequencing (Axil Scientific, Singapore).

**In vivo photoactivable crosslinking.** We adopted previously described protocol (4) for all in vivo photoactivable crosslinking experiments. Briefly, amber stop codon (TAG) was introduced at selected positions in either pDSW206*ompC* or pCDF*mIaA-His* plasmids via site directed mutagenesis using primers listed in Table S3. For OmpC crosslinking, MC4100 with  $\Delta ompC::kan$  background harbouring p*Sup-BpaRS-6TRN* (5) and pDSW206*ompC* were used. For MlaA crosslinking, MC4100 with  $\Delta mIaA::kan$  background harbouring p*Sup-BpaRS-6TRN* (5) and pCDF*mIaA-His* were used. An overnight 5 mL culture was grown from a single colony in LB broth supplemented with appropriate antibiotics at 37 °C. Overnight cultures were diluted 1:100 into 10 mL of the same media containing 0.25 mM pBpa and grown until OD<sub>600</sub> reached ~1.0. Cells were normalized by optical density before pelleting and resuspended in 1 mL ice cold TBS (20 mM Tris pH 8.0, 150 mM NaCl). Samples were either used directly or irradiated with UV light at 365 nm for 20 min at 4 °C or room temperature. All samples were pelleted again and finally resuspended in 200 µL of 2 X Laemmli buffer, boiled

for 10 min, and centrifuged at 21,000 x *g* in a microcentrifuge for one min at room temperature; 15  $\mu$ L of each sample subjected to SDS-PAGE and immunoblot analyses.

**Over-expression and purification of OmpC-MlaA-His complexes.** All proteins were overexpressed in and purified from BL21( $\lambda$ DE3) derivatives. We found that BL21( $\lambda$ DE3) strains from multiple labs do not actually produce OmpC; therefore, to obtain OmpC-MlaA complexes, we deleted *ompF* from the chromosome and introduced *ompC* on a plasmid. OmpC-MlaA-His protein complexes were over-expressed and purified from BL21( $\lambda$ DE3) cells with chromosomal  $\Delta ompF::kan$  background co-transformed with either pDSW206*ompC*<sub>pBpa</sub>, p*Sup-BpaRS-6TRN* and pCDF*dmlaA-His* (for in vitro crosslinking experiments), or pACYC184*ompC* and pET22b(+)*dmlaA-His* (for characterization of the wildtype complex). An overnight 10 mL culture was grown from a single colony in LB broth supplemented with appropriate antibiotics at 37 °C. The cell culture was then used to inoculate a 1-L culture and grown at the same temperature until OD<sub>600</sub> reached ~ 0.6. For induction, 0.5 mM IPTG (Axil Scientific, Singapore) was added and the culture was grown for another 3 h at 37 °C. Cells were pelleted by centrifugation at 4,700 x *g* for 20 min and then resuspended in 10-mL TBS containing 1 mM PMSF (Calbiochem) and 30 mM imidazole (Sigma-Aldrich). Cells were lysed with three rounds of sonication on ice (38 % power, 1 second pulse on, 1 second pulse off for 3 min). Cell lysates were incubated overnight with 1 % n-dodecyl  $\beta$ -D-maltoside (DDM, Calbiochem) at 4 °C. Cell debris was removed by centrifugation at 24,000 x *g* for 30 min at 4 °C. Subsequently, supernatant was incubated with 1 mL Ni-NTA nickel resin (QIAGEN), pre-equilibrated with 20 mL of wash buffer (TBS containing 0.025 % DDM and 80 mM imidazole) in a column for 1 h at 4 °C with rocking. The mixture was allowed to drain by gravity before washing vigorously with 10 x 10 mL of wash buffer and eluted with 10 mL of elution buffer (TBS containing 0.025% DDM and 500 mM imidazole). The eluate was concentrated in an Amicon Ultra 100 kDa cut-off ultra-filtration device (Merck Millipore) by centrifugation at 4,000 x *g* to ~500  $\mu$ L. Proteins were further purified by SEC system (AKTA Pure, GE Healthcare, UK) at 4 °C on a prepacked Superdex 200 increase 10/300 GL column,

using TBS containing 0.025% DDM as the eluent. Protein samples were used either directly or irradiated with UV at 365 nm for in vivo photoactivable crosslinking experiments.

**SEC-MALS analysis to determine absolute molar masses of OmpC-MlaA-His complex.** Prior to each SEC-MALS analysis, a preparative SEC was performed for BSA (Sigma-Aldrich) to separate monodisperse monomeric peak and to use as a quality control for the MALS detectors. In each experiment, monomeric BSA was injected before the protein of interest and the settings (calibration constant for TREOS detector, Wyatt Technology) that gave the well-characterized molar mass of BSA (66.4 kDa) were used for the molar mass calculation of the protein of interest. SEC purified OmpC-MlaA-His was concentrated to 5 mg/mL and injected into Superdex 200 Increase 10/300 GL column pre-equilibrated with TBS and 0.025 % DDM. Light scattering (LS) and refractive index ( $n$ ) data were collected online using miniDAWN TREOS (Wyatt Technology, CA, USA) and Optilab T-rEX (Wyatt Technology, CA, USA), respectively, and analyzed by ASTRA 6.1.5.22 software (Wyatt Technology). Protein-conjugate analysis available in ASTRA software was applied to calculate non-proteinaceous part of the complex. In this analysis, the refractive index increment  $dn/dc$  values (where  $c$  is sample concentration) of 0.143 mL/g and 0.185 mL/g were used for DDM and protein complex, respectively (6). For BSA, UV extinction coefficient of 0.66 mL/(mg.cm) was used. For the OmpC-MlaA-His complex, that was calculated to be 1.66 mL/(mg.cm), based on its predicted stoichiometric ratio OmpC<sub>3</sub>MlaA.

**Affinity purification experiments.** Affinity purification experiments were conducted using  $\Delta mlaA$  strains expressing MlaA-His at low levels from the pET23/42 vector. For each strain, a 1.5-L culture (inoculated from an overnight culture at 1:100 dilution) was grown in LB broth at 37 °C until OD<sub>600</sub> of ~0.6. Cells were pelleted by centrifugation at 4700 x  $g$  for 20 min and then resuspended in 10-mL TBS containing 1 mM PMSF (Calbiochem) and 50 mM imidazole (Sigma-Aldrich). Cells were lysed with three rounds of sonication on ice (38 % power, 1 second pulse on, 1 second pulse off for 3 min). Cell lysates were incubated overnight with 1 %

n-dodecyl  $\beta$ -D-maltoside (DDM, Calbiochem) at 4 °C. Cell debris was removed by centrifugation at 24,000 x *g* for 30 min at 4 °C. Subsequently, supernatant was incubated with 1 mL Ni-NTA nickel resin (QIAGEN), pre-equilibrated with 20 mL of wash buffer (TBS containing 0.025% DDM and 80 mM imidazole) in a column for 1 h at 4 °C with rocking. The mixture was allowed to drain by gravity before washing vigorously with 10 x 10 mL of wash buffer and eluted with 5 mL of elution buffer (TBS containing 0.025% DDM and 500 mM imidazole). The eluate was concentrated in an Amicon Ultra 100 kDa cut-off ultra-filtration device (Merck Millipore) by centrifugation at 4,000 x *g* to ~100  $\mu$ L. The concentrated sample was mixed with equal amounts of 2X Laemmli buffer, boiled at 100 °C for 10 min, and subjected to SDS-PAGE and immunoblot analyses.

**Trypsin digestion for protein N-terminal sequencing and mass spectrometry analyses.** A 1 mg/mL solution of purified OmpC-MlaA-His (OmpC was either wild-type or substituted with *p*Bpa at selected positions) complex was incubated with or without 50  $\mu$ g/mL trypsin (Sigma-Aldrich) for 1 h at room temperature. *p*Bpa substituted samples were irradiated with UV at 365 nm before trypsin digestion. Samples were then analyzed by SDS-PAGE, followed by SEC. Peak fractions from SEC for each sample were pooled, concentrated using an Amicon Ultra 100 kDa cut-off ultra-filtration device (Merck Millipore), and resuspended in 2 X Laemmli sample buffer before analyses by SDS-PAGE and immunoblot using  $\alpha$ -MlaA antibody. For N-terminal sequencing, samples were transferred onto PVDF membrane, followed by Coomassie Blue staining (1–2 s). The desired protein bands were carefully excised with a surgical scalpel. For tandem MS, protein bands were excised from a Coomassie Blue stained Tricine gel. Samples prepared for N-terminal sequencing and tandem MS were kept in sterile 1.5 mL centrifuge tubes before submission for analyses at Tufts University Core Facility, Boston, USA, and Taplin Biological Mass Spectrometry Facility, Harvard Medical School, Boston, USA, respectively.

**In vivo disulfide bond analysis.** Strain NR1216 ( $\Delta dsbA$ ) harbouring pET23/42*mIaA-His* expressing MlaA-His with site specific cysteine substitutions was grown overnight in LB broth at 37 °C. A 0.5 mL of overnight culture was normalized by optical density, added with trichloroacetic acid (TCA) at final concentration of ~14 % and mixed thoroughly at 4 °C. This step was performed to prevent scrambling of disulfide bond formed in the cysteines substituted MlaA-His. Proteins precipitated for at least 30 min on ice were centrifuged at 16,000  $\times g$  for 10 min at 4 °C. The pellet was washed with 1 mL of ice-cold acetone and centrifuged again at 16,000  $\times g$  for 10 min at 4 °C. Supernatants were then aspirated and the pellet was air dried at room temperature for at least 20 min. Samples were resuspended thoroughly with 100  $\mu$ L of either 100 mM Tris.HCl pH 8.0, 1% SDS (for non-reduced samples), or the same buffer supplemented with 100 mM of dithiothreitol (DTT) (for reduced samples), incubated for 20 min at room temperature. The samples were finally mixed with 4 X Laemmli buffer, boiled for 10 min and subjected to SDS-PAGE and immunoblotting analyses using  $\alpha$ -His antibody.

### **Docking of MlaA to OmpC**

The ClusPro server (7) was used to dock MlaA (ligand, uniprot ID: P76506, [https://gremlin2.bakerlab.org/meta\\_struct.php?page=p76506](https://gremlin2.bakerlab.org/meta_struct.php?page=p76506)) (8) to OmpC (receptor, PDB ID: 2J1N) (9). The default server settings were used in the docking procedure. The minimum distance between 6 residues on OmpC and the corresponding cross-linked peptide regions of MlaA was calculated for all the predicted structures obtained from the server. The OmpC-MlaA model with the smallest average minimum distance of all residue and peptide pairs was selected as the initial structure for use in the all-atom simulations.

### **Simulation procedures and setup**

All simulations were performed using version 5.1.4 of the GROMACS simulation package (10, 11).

*All-atom simulations.* In total, 6 all-atom simulations were performed (Table A). The simulations were performed using the CHARMM36 force field parameter set (12). The equations of motion were integrated using the Verlet leapfrog algorithm with a step size of 2 fs. Lengths of hydrogen bonds were constrained with the LINCS algorithm (13). Electrostatic interactions were treated using the smooth Particle Mesh Ewald (PME) method (14), with cutoff for short-range interactions of 1.2 nm. The van der Waals interactions were switched smoothly to zero between 1.0 and 1.2 nm. The neighbor list was updated every 20 steps. The Nose-Hoover thermostat (15, 16) with a coupling constant of 1.0 ps was used to maintain a constant system temperature of 313 K. The protein, membrane and solvent (water and ions) were coupled to separate thermostats. The Parrinello-Rahman barostat (17) with a coupling constant of 5.0 ps was used to maintain a pressure of 1 bar. Semi-isotropic pressure coupling was used for all the membrane systems, while isotropic coupling was used for the solvent-only system. Initial velocities were set according to the Maxwell distribution.

Proteins were inserted into a pre-equilibrated, symmetrical 1,2-dimyristoyl-phosphatidylethanolamine (DMPE) membrane over 5 ns using the membed tool (18) in the GROMACS simulation package. Subsequent equilibration, with position restraints of 1000 kJ mol<sup>-1</sup> placed on all non-hydrogen protein atoms, was performed for 20 ns to allow the solvent and lipids to equilibrate around the proteins. The position restraints were removed before performing the production runs.

Table A. Summary of all-atom molecular simulations: system compositions and simulation times

| Protein Configuration               | Lipids   | Water and Ions                                                    | Simulation time (# of simulations x ns) |
|-------------------------------------|----------|-------------------------------------------------------------------|-----------------------------------------|
| MlaA                                | N/A      | 9439 H <sub>2</sub> O<br>29 K <sup>+</sup><br>19 Cl <sup>-</sup>  | 1 x 500                                 |
| MlaA                                | 272 DMPE | 11734 H <sub>2</sub> O<br>42 K <sup>+</sup><br>32 Cl <sup>-</sup> | 1 x 500                                 |
| OmpC trimer<br>MlaA (ClusPro model) | 980 DMPE | 36113 H <sub>2</sub> O<br>98 K <sup>+</sup><br>98 Cl <sup>-</sup> | 1 x 500<br>1 x 320<br>1 x 130           |



In total, three separate production simulations with different initial velocities were performed of the OmpC-MlaA complex, resulting in 3 trajectories of 500 ns, 320 ns, and 130 ns in length, respectively. Clustering was performed on the MlaA structures obtained from a combined trajectory of all three atomistic simulations – a total of 4750 frames spaced every 0.2 ns. The structures were assigned to clusters using Root Mean Squared Distance (RMSD) with a 0.1 nm cut-off. Four clusters were observed to contain greater than 100 frames. The central structure of these four clusters was used to generate MlaA parameters for four separate Coarse Grained simulations. `trj_cavity` was used to identify the location the pore cavity (19), and `Hole` was used to create the pore profile (20).

*Coarse Grained Simulations.* In total, 6 Coarse Grained (CG) simulations were performed (Table B). The CG simulations were performed using the MARTINI 2.2 force field (21, 22). An elastic network was used to preserve the tertiary and quaternary structures of proteins. The network was created between backbone beads that were within a range of 0.5 and 0.9 nm from one another in the initial structure. The harmonic potential force constant for elastic bonds was set to  $500 \text{ kJ mol}^{-1} \text{ nm}^{-2}$ . The elastic network was applied separately to the OmpC trimeric complex and MlaA i.e. there were no harmonic bonds between the OmpC trimer and MlaA.

In all simulations, the equations of motion were integrated using the Verlet leapfrog algorithm with a step size of 10 fs. Electrostatic interactions were treated using the reaction field method with a short-range cutoff of 1.1 nm (23). The dielectric constant was set to 15 within this cutoff. The van der Waals interactions were shifted to zero at 1.1 nm. The velocity rescale thermostat (24) was used to maintain a temperature of 323 K or 350 K and Berendsen barostat (25), with semi-isotropic coupling, was used to maintain a system pressure of 1 bar. Protein, membrane and solvent (water and ions) were coupled to separate thermostats. Initial velocities were set according to the Maxwell distribution.

The proteins were inserted into pre-equilibrated lipid bilayers, consisting of an asymmetric distribution of lipid A, 1-palmitoyl-2-vacenoylethanolamine (PVPE), and 1-palmitoyl-2-vacenoylethanolamine (PVPE), and 1-palmitoyl-2-vacenoylethanolamine (PVPE).

phosphatidylglycerol (PVPG), by superimposition of the protein and membrane coordinates. Any overlapping lipids and solvent particles were removed from the system. Any remaining bad contacts were relaxed with 1000 steps steepest descent energy minimization. Harmonic position restraints with a force constant of 1000 kJ mol<sup>-1</sup> were placed on all protein backbone particles for 200 ns to allow the solvent and lipids to equilibrate around the proteins. The restraints were removed for production runs.

Table B. Summary of Coarse Grained Simulations: system components and simulations time.

| Protein Configuration                                              | Outer Leaflet Lipids              | Inner Leaflet Lipids | Water and Ions                                                                            | System Temp. (K) | Simulation time (# of simulations x ns) |
|--------------------------------------------------------------------|-----------------------------------|----------------------|-------------------------------------------------------------------------------------------|------------------|-----------------------------------------|
| OmpC trimer                                                        | 58 lipid A<br>146 PVPE<br>16 PVPG | 236 PVPE<br>25 PVPG  | 13887 W<br>(10% WF)<br>116 Mg <sup>2+</sup><br>314 Na <sup>+</sup><br>228 Cl <sup>-</sup> | 350              | 1 x 8000                                |
| OmpC trimer<br>MlaA<br>(ClustPro model)                            | 76 lipid A<br>69 PVPE<br>7 PVPG   | 198 PVPE<br>22 PVPG  | 6843 W<br>(10% WF)<br>152 Mg <sup>2+</sup><br>692 Na <sup>+</sup><br>608 Cl <sup>-</sup>  | 323              | 1 x 5000                                |
| OmpC trimer<br>MlaA<br>(Clusters 1 to 4 from all atom simulations) | 76 lipid A<br>69 PVPE<br>7 PVPG   | 193 PVPE<br>22 PVPG  | 6800 W<br>(10% WF)<br>152 Mg <sup>2+</sup><br>692 Na <sup>+</sup><br>608 Cl <sup>-</sup>  | 323              | 4 x 5000                                |

**Backmapping protocol.** CG coordinates were backmapped by the use of geometric projection and further force-field, CHARMM36 (12), relaxation (SD minimization). This was followed by a NVT equilibration simulation step, with position restraints placed on the heavy atoms of the protein, as described elsewhere (26).

**Temperature titration for chromosomal *ompC* mutants.** Purified wild-type and mutant OmpC-MlaA-His complexes were aliquoted into 1.5 mL centrifuge tubes and incubated in water bath set at different temperatures

for 10 min. 20  $\mu$ l of each sample were transferred into separate tubes and mixed immediately with equal volume of 2 X Laemmli buffer and subjected to SDS-PAGE in 12 % Tris.HCl gels, followed by Coomassie Blue staining (Sigma-Aldrich).

**LPS labeling and lipid A isolation.** Mild acid hydrolysis of [ $^{32}$ P]-labeled cultures was used to isolate lipid A according to a procedure described previously (1, 27, 28) with some modifications. 5 mL cultures were grown (inoculated with overnight cultures at 1:100 dilution) in LB broth at 37 °C until OD<sub>600</sub> reached ~0.5–0.7 (exponential) or ~2–4 (stationary). Cultures were uniformly labeled with 1  $\mu$ Ci mL<sup>-1</sup> [ $^{32}$ P]-disodium phosphate (Perkin-Elmer) from the start of inoculation. One MC4100 wild-type culture labeled with [ $^{32}$ P] was treated with 25 mM EDTA, pH 8.0 for 10 min prior to harvesting. Cells (5 mL and 1 mL for exponential and stationary phase cultures respectively) were harvested by centrifugation at 4700  $\times$  g for 10 min and washed twice with 1 mL PBS (137 mM NaCl, 2.7 mM KCl, 10 mM Na<sub>2</sub>HPO<sub>4</sub>, 1.8 mM KH<sub>2</sub>PO<sub>4</sub>, pH 7.4) at 5000  $\times$  g for 10 min. Each cell pellet was resuspended in 0.32 mL PBS, and converted into single phase Bligh/Dyer mixture (chloroform/methanol/water:1/2/0.8) by adding 0.8 mL methanol and 0.4 mL chloroform. The single phase Bligh/Dyer mixture was incubated at room temperature for 20 min, followed by centrifugation at 21,000  $\times$  g for 30 min. Each pellet obtained was washed once with 1 mL freshly made single phase Bligh/Dyer mixture and centrifuged as above. The pellet was later resuspended in 0.45 mL 12.5 mM sodium acetate containing 1 % SDS, pH 4.5. The mixture was sonicated for 15 min before incubation at 100 °C for 40 min. The mixture was converted to a two-phase Bligh/Dyer mixture (chloroform/methanol/water: 2/2/1.8) by adding 0.50 mL methanol and 0.50 mL chloroform. The lower phase of each mixture was collected after phase partitioning by centrifugation at 21 000  $\times$  g for 30 min. The collected lower phase was washed once with 1 mL of the upper phase derived from the freshly made two-phase Bligh/Dyer mixture and centrifuged as above. The final lower phase was collected after phase partitioning by centrifugation and dried under N<sub>2</sub> gas. The dried radiolabeled lipid A samples were redissolved in 100  $\mu$ L of chloroform/methanol mixture (4/1), and 20  $\mu$ L of the samples were used for scintillation counting (MicroBeta2®, Perkin-Elmer). Equal amounts of radiolabeled lipids (cpm/lane) were spotted onto the TLC plate (Silica Gel 60 F254, Merck Millipore) and

were separated using the solvent system consisting of chloroform/pyridine/96 % formic acid/water (50/50/14.6/4.6) (29). The TLC plate was then dried and exposed to phosphor storage screens (GE Healthcare). Phosphor-screens were visualized in a phosphor-imager (Storm 860, GE Healthcare), and the spots were analyzed by ImageQuant TL analysis software (version 7.0, GE Healthcare). Spots were quantified and averaged based on three independent experiments of lipid A isolation.

**OM permeability studies.** OM sensitivity against SDS/EDTA was judged by colony-forming-unit (CFU) analyses on LB agar plates containing indicated concentrations of SDS/EDTA. Briefly, 5 mL cultures were grown (inoculated with overnight cultures at 1:100 dilution) in LB broth at 37 °C until OD<sub>600</sub> reached ~0.4-0.6. Cells were normalized by optical density, first diluted to OD<sub>600</sub> = 0.1 (~10<sup>8</sup> cells), and then serially diluted (ten-fold) in LB broth using 96-well microtiter plates. 2.5 µL of the diluted cultures were manually spotted onto the plates, dried, and incubated overnight at 37 °C. Plate images were visualized by *G:Box Chemi-XT4* (Genesys version 1.4.3.0, Syngene).

**SDS-PAGE, immunoblotting and staining.** All samples subjected to SDS-PAGE were mixed 1:1 with 2X Laemmli buffer. Except for temperature titration experiments, the samples were subsequently either kept at room temperature or subjected to boiling at 100 °C for 10 min. Equal volumes of the samples were loaded onto the gels. As indicated in the figure legends, SDS-PAGE was performed using either 12% or 15% Tris.HCl gels (30) or 15% Tricine gel (31) at 200 V for 50 min. After SDS-PAGE, gels were visualized by either Coomassie Blue staining, or subjected to immunoblot analysis. Immunoblot analysis was performed by transferring protein bands from the gels onto polyvinylidene fluoride (PVDF) membranes (Immun-Blot 0.2 µm, Bio-Rad, CA, USA) using semi-dry electroblotting system (Trans-Blot Turbo Transfer System, Bio-Rad). Membranes were blocked for 1 h at room temperature by 1 X casein blocking buffer (Sigma-Aldrich), washed and incubated with either primary antibodies (monoclonal  $\alpha$ -MlaA (1) (1:3000) and  $\alpha$ -OmpC (2) (1:1500)) or monoclonal  $\alpha$ -His

antibody (pentahistidine) conjugated to the horseradish peroxidase (HRP) (Qiagen, Hilden, Germany) at 1:5000 dilution for 1 – 3 h at room temperature. Secondary antibody ECL™ anti-mouse IgG-HRP was used at 1:5000 dilution. Luminata Forte Western HRP Substrate (Merck Millipore) was used to develop the membranes, and chemiluminescence signals were visualized by G:Box Chemi-XT4 (Genesys version 1.4.3.0, Syngene).

### Supplementary references

1. Chong ZS, Woo WF, & Chng SS (2015) Osmoporin OmpC forms a complex with MlaA to maintain outer membrane lipid asymmetry in Escherichia coli. *Mol Microbiol* 98(6):1133-1146.
2. Khetrpal V, *et al.* (2015) A set of powerful negative selection systems for unmodified Enterobacteriaceae. *Nucleic Acids Res* 43(13):e83.
3. Murphy KC & Campellone KG (2003) Lambda Red-mediated recombinogenic engineering of enterohemorrhagic and enteropathogenic E. coli. *BMC Mol Biol* 4:11.
4. Chin JW, Martin AB, King DS, Wang L, & Schultz PG (2002) Addition of a photocrosslinking amino acid to the genetic code of Escherichiacoli. *Proc Natl Acad Sci U S A* 99(17):11020-11024.
5. Ryu Y & Schultz PG (2006) Efficient incorporation of unnatural amino acids into proteins in Escherichia coli. *Nat Methods* 3(4):263-265.
6. Slotboom DJ, Duurkens RH, Olieman K, & Erkens GB (2008) Static light scattering to characterize membrane proteins in detergent solution. *Methods* 46(2):73-82.
7. Kozakov D, *et al.* (2017) The ClusPro web server for protein-protein docking. *Nat Protoc* 12(2):255-278.
8. Ovchinnikov S, *et al.* (2017) Protein structure determination using metagenome sequence data. *Science* 355(6322):294-298.
9. Basle A, Rummel G, Storici P, Rosenbusch JP, & Schirmer T (2006) Crystal structure of osmoporin OmpC from E. coli at 2.0 Å. *J Mol Biol* 362(5):933-942.

10. Berendsen HJC vdSD, van Drunen R (1995) GROMACS: A message-passing parallel molecular dynamics implementation. . *Comput Phys Commun* 91(1-3):43-56.
11. Van Der Spoel D, *et al.* (2005) GROMACS: fast, flexible, and free. *J Comput Chem* 26(16):1701-1718.
12. Best RB, *et al.* (2012) Optimization of the additive CHARMM all-atom protein force field targeting improved sampling of the backbone phi, psi and side-chain chi(1) and chi(2) dihedral angles. *J Chem Theory Comput* 8(9):3257-3273.
13. Hess B BH, Berendsen HJC, Fraaije JGEM (1997) LINCS: A linear constraint solver for molecular simulations. *J Comput Chem* 18(12):8577-8593.
14. Essmann U, *et al.* (1995) A smooth particle mesh Ewald method. *The Journal of Chemical Physics* 103(19):8577-8593.
15. NosÉ S (2002) A molecular dynamics method for simulations in the canonical ensemble. *Molecular Physics* 100(1):191-198.
16. Hoover WG (1985) Canonical dynamics: Equilibrium phase-space distributions. *Phys Rev A Gen Phys* 31(3):1695-1697.
17. Nosé S & Klein ML (2006) Constant pressure molecular dynamics for molecular systems. *Molecular Physics* 50(5):1055-1076.
18. Wolf MG, Hoefling M, Aponte-Santamaria C, Grubmuller H, & Groenhof G (2010) g\_membed: Efficient insertion of a membrane protein into an equilibrated lipid bilayer with minimal perturbation. *J Comput Chem* 31(11):2169-2174.
19. Paramo T, East A, Garzon D, Ulmschneider MB, & Bond PJ (2014) Efficient Characterization of Protein Cavities within Molecular Simulation Trajectories: trj\_cavity. *J Chem Theory Comput* 10(5):2151-2164.
20. Smart OS, Goodfellow JM, & Wallace BA (1993) The pore dimensions of gramicidin A. *Biophys J* 65(6):2455-2460.

21. Monticelli L, *et al.* (2008) The MARTINI Coarse-Grained Force Field: Extension to Proteins. *J Chem Theory Comput* 4(5):819-834.
22. Marrink SJ, Risselada HJ, Yefimov S, Tieleman DP, & de Vries AH (2007) The MARTINI force field: coarse grained model for biomolecular simulations. *J Phys Chem B* 111(27):7812-7824.
23. Tironi IG, Sperb R, Smith PE, & van Gunsteren WF (1995) A generalized reaction field method for molecular dynamics simulations. *The Journal of Chemical Physics* 102(13):5451-5459.
24. Bussi G, Donadio D, & Parrinello M (2007) Canonical sampling through velocity rescaling. *J Chem Phys* 126(1):014101.
25. Berendsen HJC, Postma JPM, van Gunsteren WF, DiNola A, & Haak JR (1984) Molecular dynamics with coupling to an external bath. *The Journal of Chemical Physics* 81(8):3684-3690.
26. Wassenaar TA, Pluhackova K, Bockmann RA, Marrink SJ, & Tieleman DP (2014) Going Backward: A Flexible Geometric Approach to Reverse Transformation from Coarse Grained to Atomistic Models. *J Chem Theory Comput* 10(2):676-690.
27. Zhou Z, Lin S, Cotter RJ, & Raetz CR (1999) Lipid A modifications characteristic of Salmonella typhimurium are induced by NH<sub>4</sub>VO<sub>3</sub> in Escherichia coli K12. Detection of 4-amino-4-deoxy-L-arabinose, phosphoethanolamine and palmitate. *J Biol Chem* 274(26):18503-18514.
28. Jia W, *et al.* (2004) Lipid trafficking controls endotoxin acylation in outer membranes of Escherichia coli. *J Biol Chem* 279(43):44966-44975.
29. Wu T, *et al.* (2006) Identification of a protein complex that assembles lipopolysaccharide in the outer membrane of Escherichia coli. *Proc Natl Acad Sci U S A* 103(31):11754-11759.
30. Laemmli UK (1970) Cleavage of structural proteins during the assembly of the head of bacteriophage T4. *Nature* 227(5259):680-685.
31. Schagger H (2006) Tricine-SDS-PAGE. *Nat Protoc* 1(1):16-22.
32. Kyte J & Doolittle RF (1982) A simple method for displaying the hydropathic character of a protein. *J Mol Biol* 157(1):105-132.

33. Casadaban MJ (1976) Transposition and fusion of the lac genes to selected promoters in *Escherichia coli* using bacteriophage lambda and Mu. *J Mol Biol* 104(3):541-555.
34. Ruiz N, Chng SS, Hiniker A, Kahne D, & Silhavy TJ (2010) Nonconsecutive disulfide bond formation in an essential integral outer membrane protein. *Proc Natl Acad Sci U S A* 107(27):12245-12250.
35. Chang AC & Cohen SN (1978) Construction and characterization of amplifiable multicopy DNA cloning vehicles derived from the P15A cryptic miniplasmid. *J Bacteriol* 134(3):1141-1156.
36. Weiss DS, Chen JC, Ghigo JM, Boyd D, & Beckwith J (1999) Localization of FtsI (PBP3) to the septal ring requires its membrane anchor, the Z ring, FtsA, FtsQ, and FtsL. *J Bacteriol* 181(2):508-520.



## Supplementary Figures

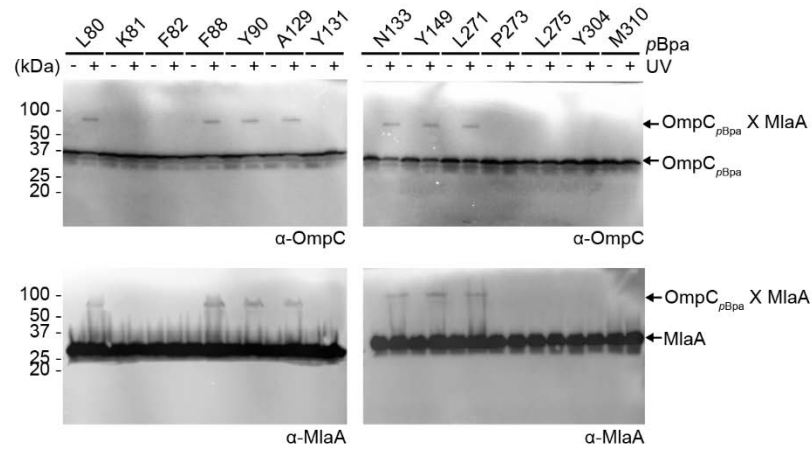

**Figure S1.** Seven more positions at the dimeric interface of the OmpC trimer contact MlaA. Immunoblots showing UV-dependent formation of crosslinks between OmpC and MlaA in  $\Delta ompC$  cells expressing OmpC substituted with *pBpa* at indicated positions, selected as part of the localized search.

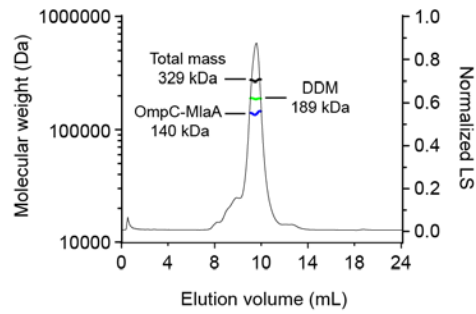

**Figure S2.** SEC-MALS analysis of the OmpC-MlaA complex revealing that one copy of MlaA binds to the OmpC trimer. As indicated, total molecular mass: 329 ( $\pm 0.4\%$ ) kDa; protein molecular mass: 140 ( $\pm 0.4\%$ ) kDa (observed), 148 kDa (predicted, OmpC<sub>3</sub>MlaA); modifier (DDM) molecular mass: 189 ( $\pm 0.8\%$ ) kDa. Numbers stated after  $\pm$  show statistical consistency of analysis.

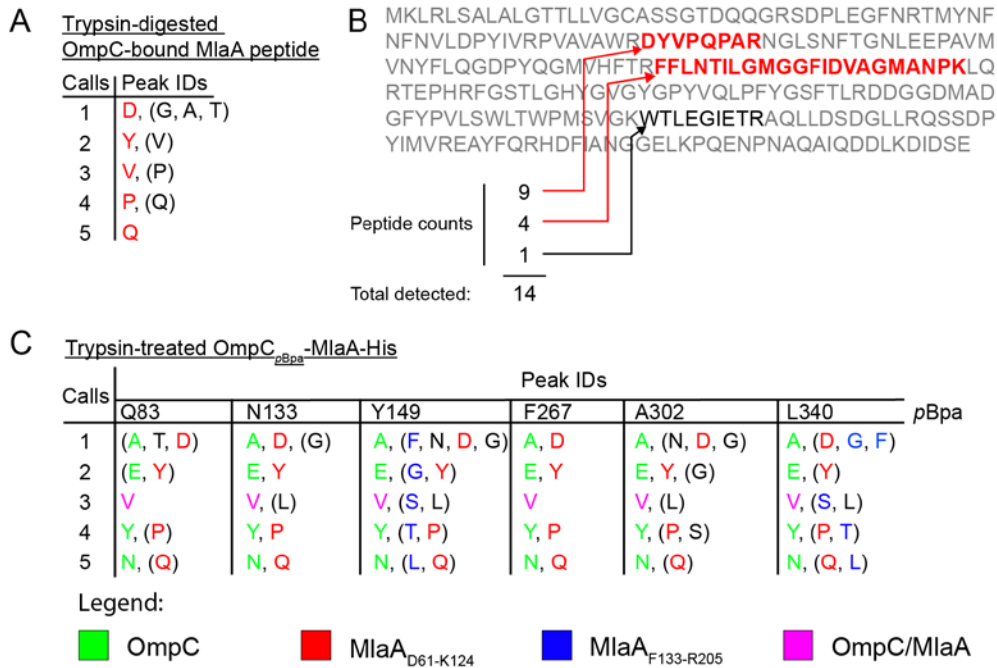

**Figure S3.** N-terminal sequencing and MS/MS analyses identified two specific MlaA peptides binding to OmpC. (A) First five residue calls for the MlaA peptide remaining bound to OmpC after trypsin digestion (see Fig. 2A) revealed that it starts with D<sup>61</sup>YVPQ of full-length MlaA protein. (B) MS/MS analysis of the MlaA peptide remaining bound to OmpC after trypsin digestion detected two MlaA fragments with high peptide counts (sequences colored *red*), suggesting that the OmpC-bound peptide has boundaries from D61 to K124. (C) First five residue calls for protein bands containing MlaA peptides crosslinked to OmpC<sub>pBpa</sub> (see Fig. 2B) revealed the presence of MlaA peptides starting with D<sup>61</sup>YVPQ and F<sup>133</sup>GSTL, along with OmpC N-terminus A<sup>21</sup>EVYN. Residue calls are assigned to the respective protein/peptide as denoted by the legend.

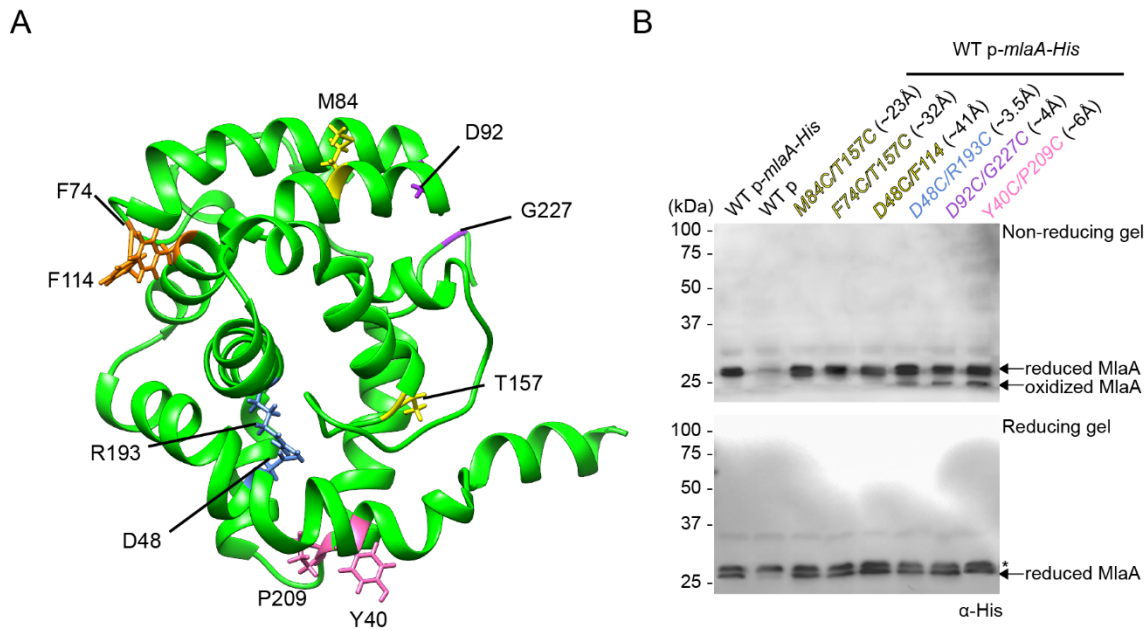

**Figure S4.** Residue pairs on MlaA predicted to contact each other based on coevolution analysis allow the formation of disulfide bonds when substituted with cysteines. (A) Cartoon representation of the MlaA structural model predicted based on residue-residue contacts inferred from coevolution analysis of metagenomic sequence data prediction (GREMLIN, (8)), with strongly co-evolved residue pairs that are mutated to cysteines highlighted (same colored sticks). (B) Immunoblots showing oxidized or reduced forms of indicated MlaA-His double cysteine variants expressed in wild-type cells from the pET23/42 vector (p). Samples were subjected to non-reducing (*top*) or reducing (*bottom*) SDS-PAGE prior to transfer. A protein that cross-reacted with the  $\alpha$ -His antibody is denoted with (\*). Distances between cysteine pairs in unit angstrom ( $\text{\AA}$ ), as measured in the model in (A), are indicated in parentheses.

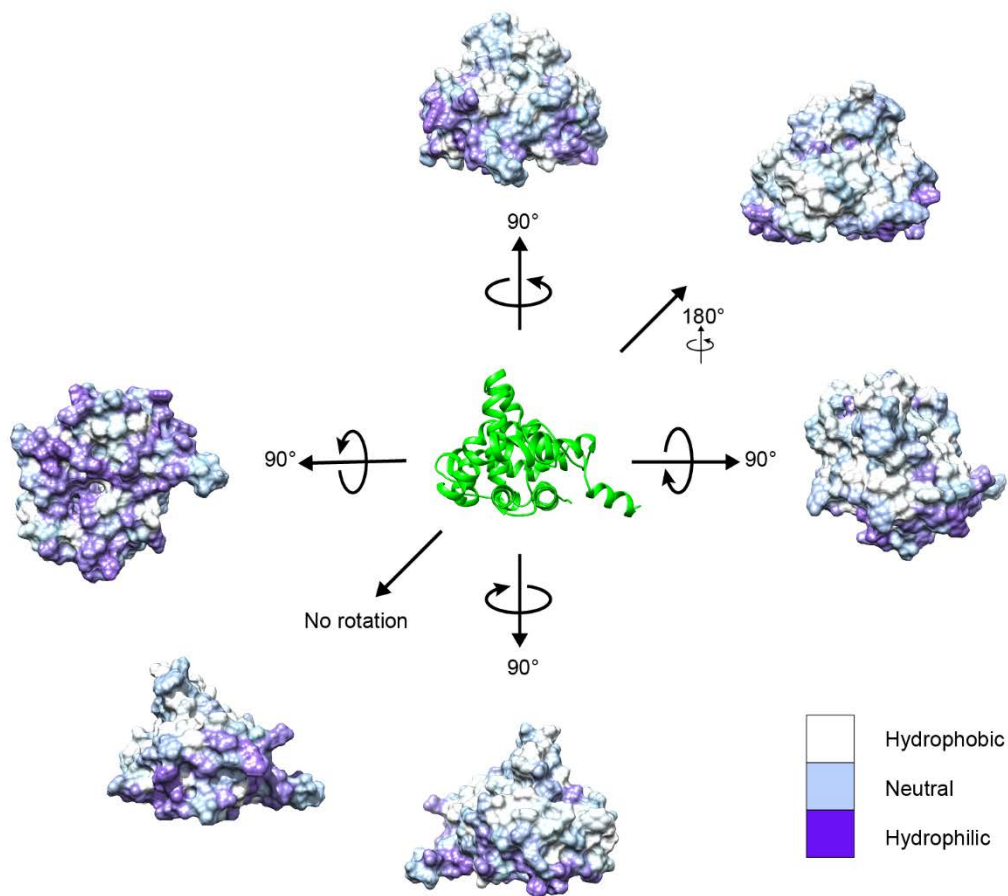

**Figure S5.** The surface of MlaA is mostly hydrophobic. Surface representation of the MlaA model (8) depicted in multiple orientations and colored based on amino acid hydrophobicity. Purple, light blue and white represent most hydrophilic to most hydrophobic amino acids based on the Kyte-Doolittle scale (32).

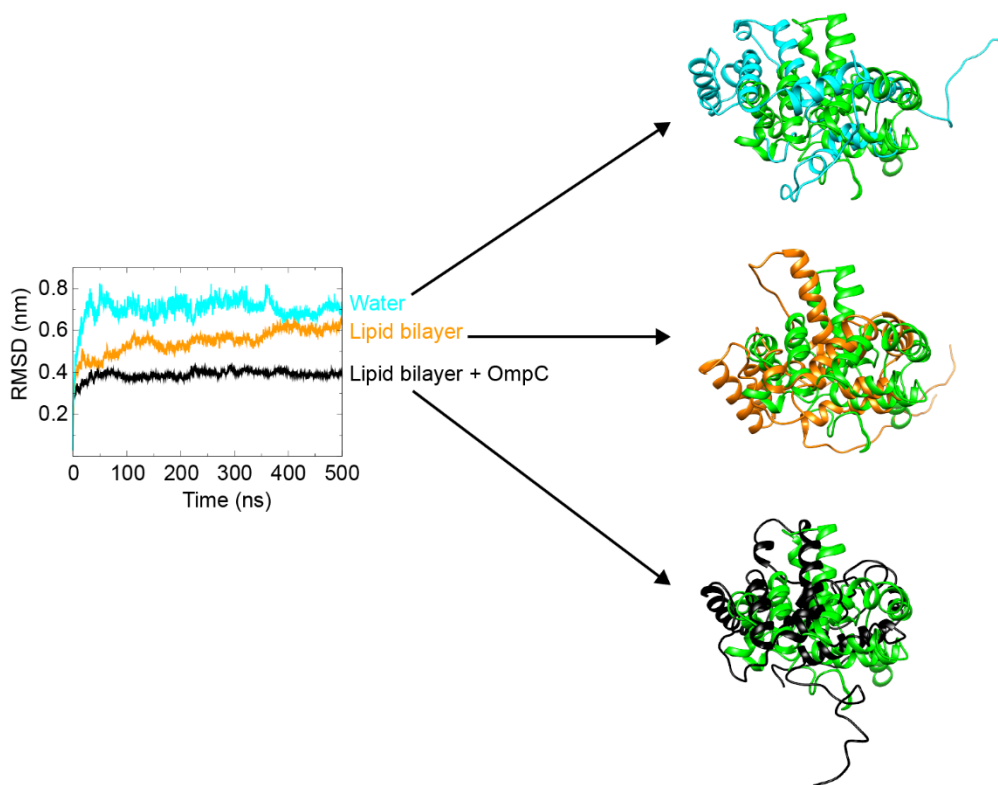

**Figure S6.** The MlaA structure modelled from co-evolution analysis (8) is most stable in the lipid bilayer and when bound to OmpC. Averaged root-mean-square-deviation (RMSD) plots illustrating the changes of the backbone of MlaA models over the course of all-atomistic MD simulations when placed in water (*cyan*), a lipid bilayer (*orange*), or in complex with OmpC in the bilayer (*black*). Superimpositions of the initial (*green*) and final structures for each simulation are shown on the right.

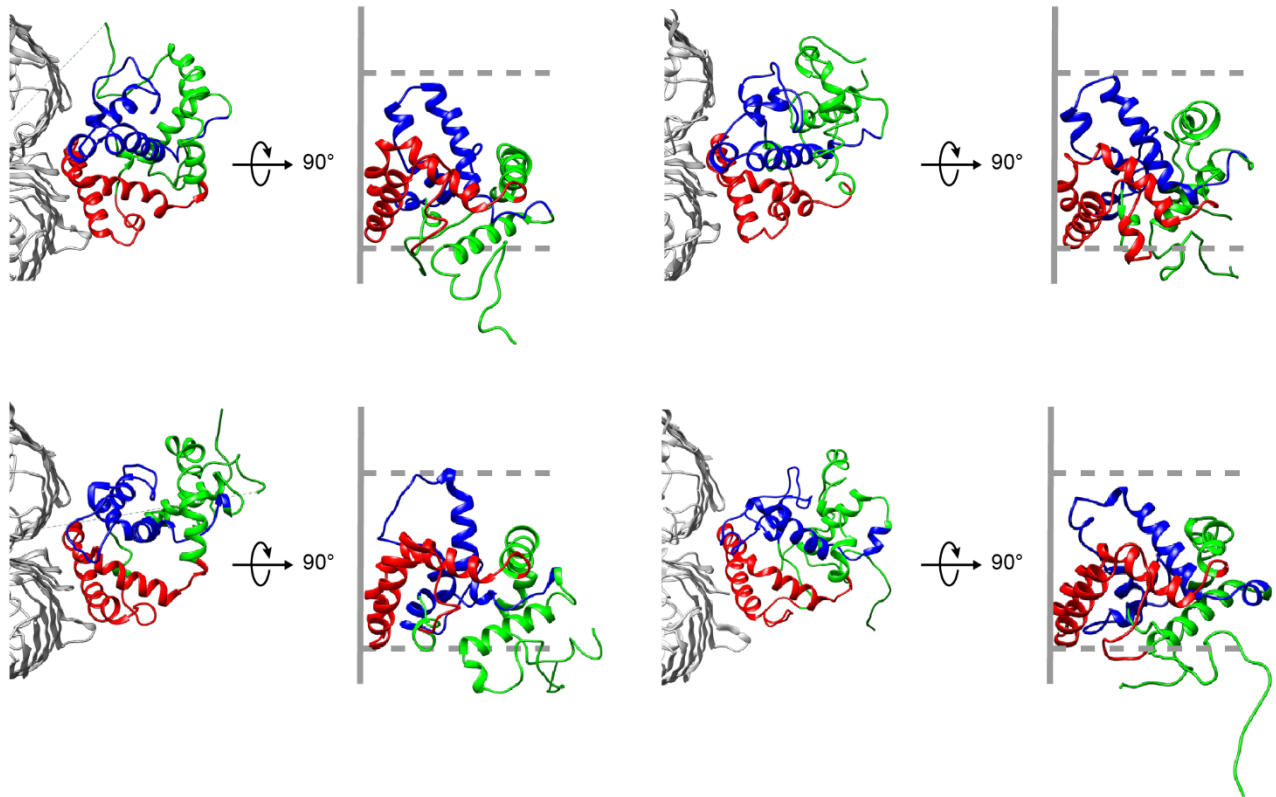

**Figure S7.** Four major clusters of all-atomistic MD simulated OmpC-MlaA structure depict how MlaA interacts with OmpC in the OM bilayer. The bottom right model is reproduced in Fig. 3A. MlaA<sub>D61-K124</sub> and MlaA<sub>F133-R205</sub> peptides are highlighted in *red* and *blue*, respectively, as in Fig. 2D. The OM boundaries are indicated as gray dashed lines.

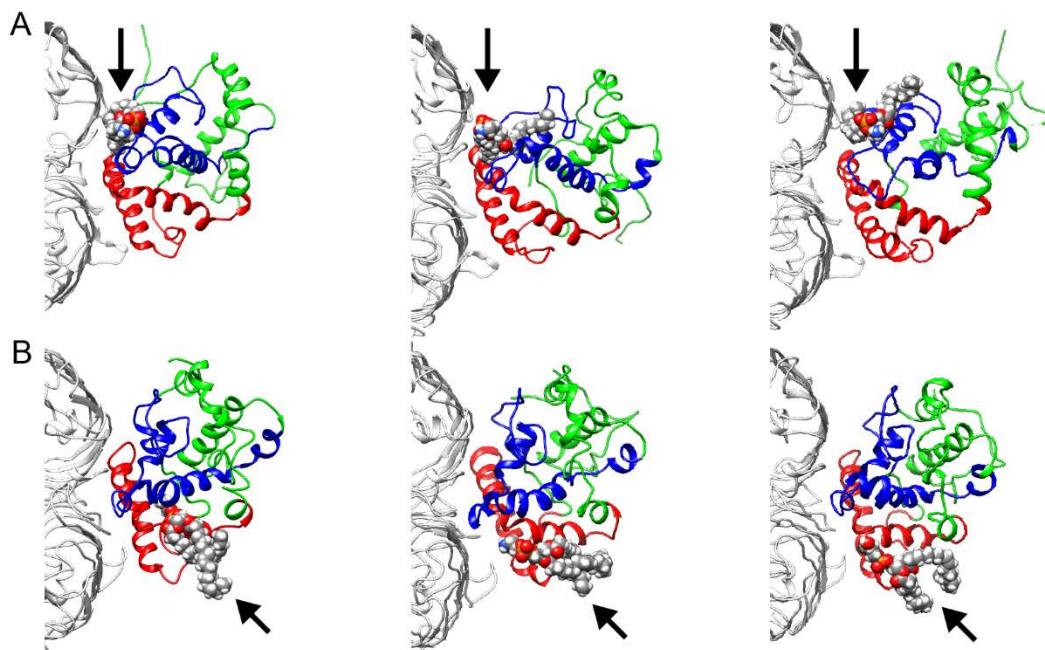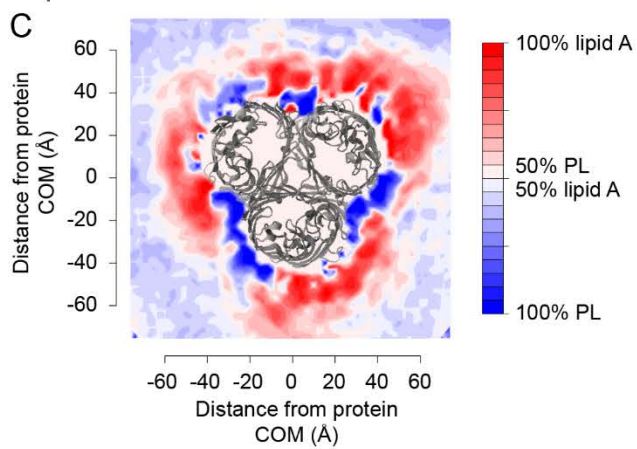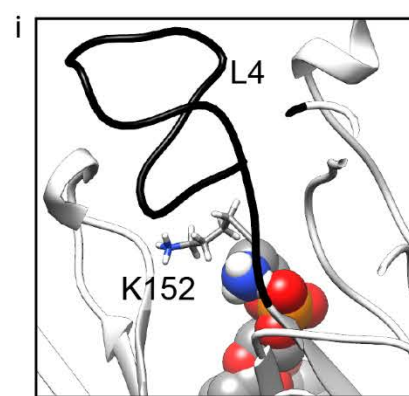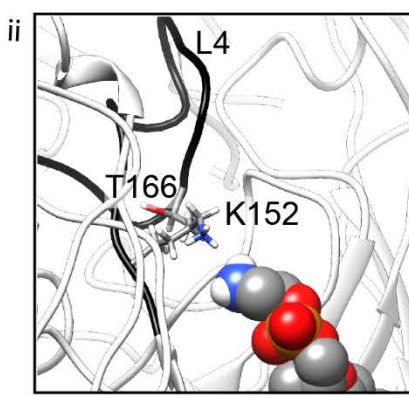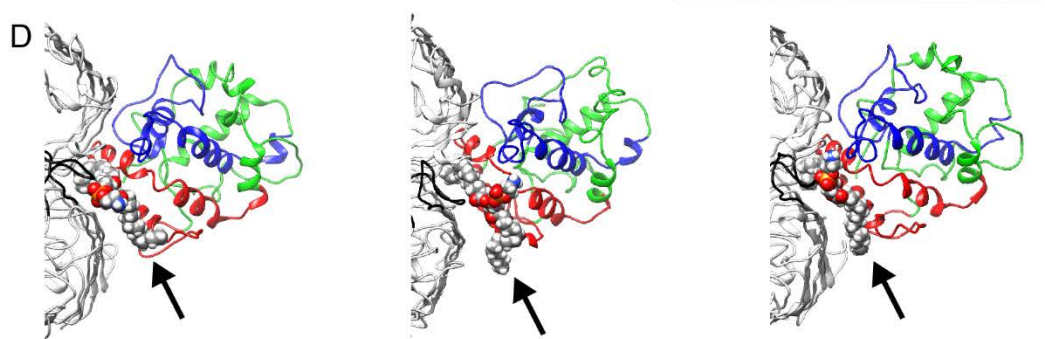



**Figure S8.** Snapshots of MD simulations depicting PLs found around the OmpC-MlaA complex. (A) Cartoon representations (*top view*) of OmpC-MlaA structural models backmapped from coarse-grained simulations depicting PL molecules (*spheres*) found at the binding interfaces between OmpC (*white*) and MlaA (overall *green*, but with MlaA<sub>D61-K124</sub> and MlaA<sub>F133-R205</sub> peptides highlighted in *red* and *blue*, respectively, as in Fig. 2D). (B) Cartoon representations (*top view*) of OmpC-MlaA structural models backmapped from coarse-grained simulations highlighting PL molecules (*spheres*) approaching the putative channel of MlaA via their headgroups. (C) Contour map indicating relative probability of finding outer leaflet PLs and lipid A around an OmpC trimer (cartoon representation, *top view*) in an asymmetric OM bilayer model. The outer leaflet of the OM contains PLs and lipid A in a 3:1 molar ratio. Cartoon representation (*top view*) of OmpC (*white*) with PLs (*spheres*) found at the dimeric interfaces is shown below. Residues in loop 4 of OmpC (L4<sub>OmpC</sub>, *black*) interacting with the PL headgroups are highlighted in the expanded representations on the right (*i* and *ii*). (D) Cartoon representations (*top view*) of OmpC-MlaA structural models backmapped from coarse-grained simulations depicting PLs (*spheres*) found between OmpC and MlaA.

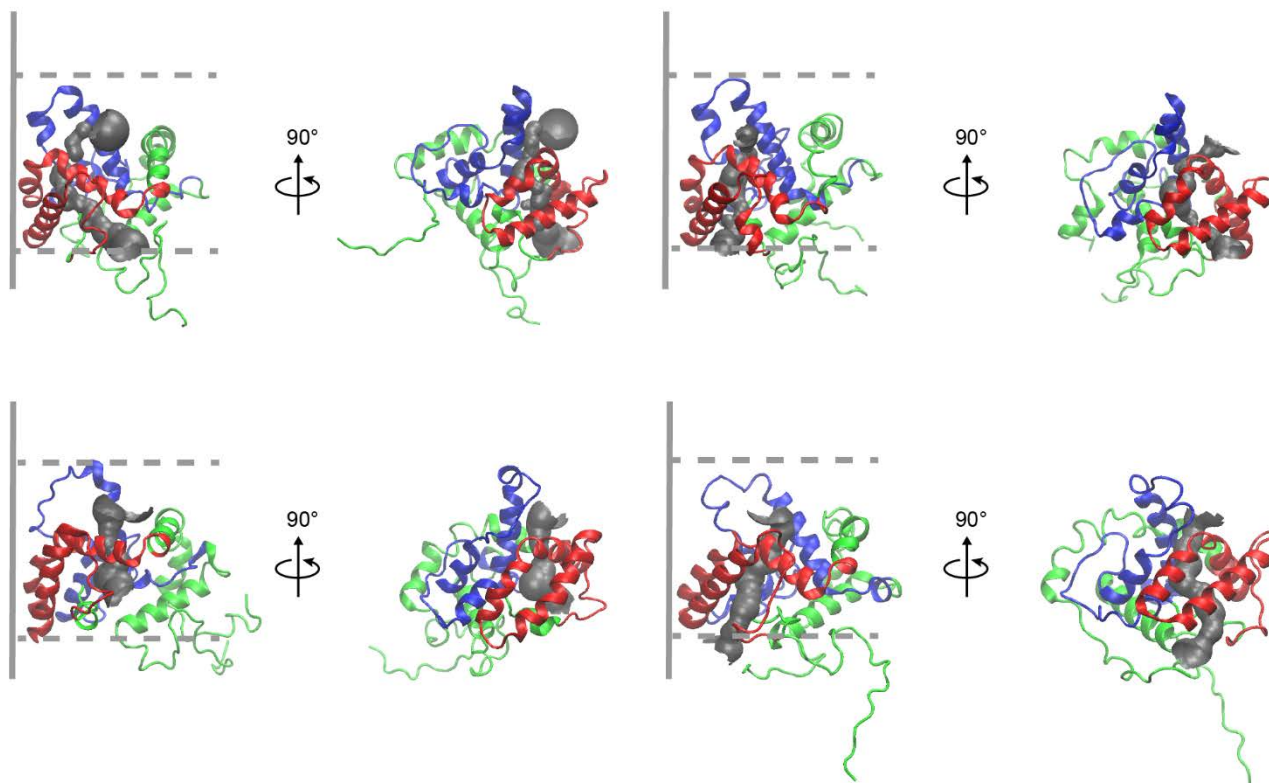

**Figure S9.** Four major clusters of all-atomistic MD simulated OmpC-MlaA structure with the putative channels depicted in *gray*. The bottom right model is reproduced in Fig. 4A. OmpC is represented as *gray* solid lines. MlaA<sub>D61-K124</sub> and MlaA<sub>F133-R205</sub> peptides are highlighted in *red* and *blue*, respectively, as in Fig. 2D. The OM boundaries are indicated as *gray* dashed lines.

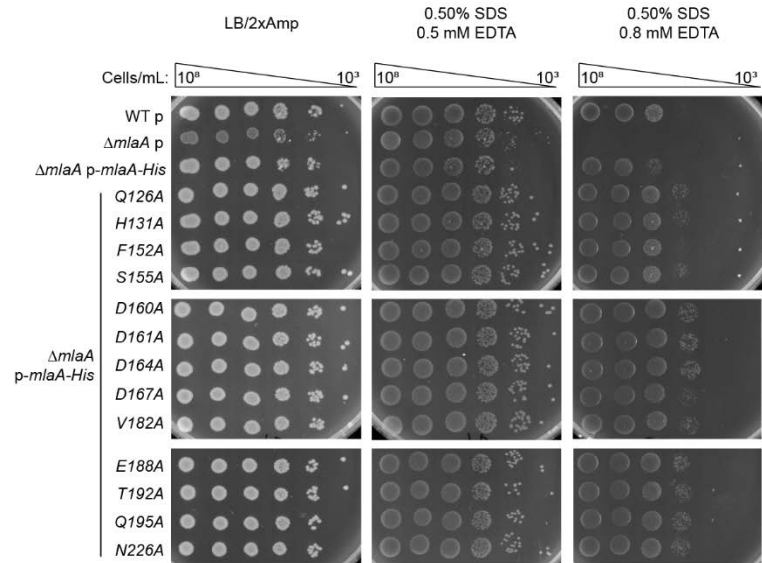

**Figure S10.** Single alanine substitutions in the putative channel do not disrupt the function of MlaA. Analysis of SDS/EDTA sensitivity of wild-type (WT) and  $\Delta mIaA$  strains producing indicated MlaA channel variants from the pET23/42 vector (p).

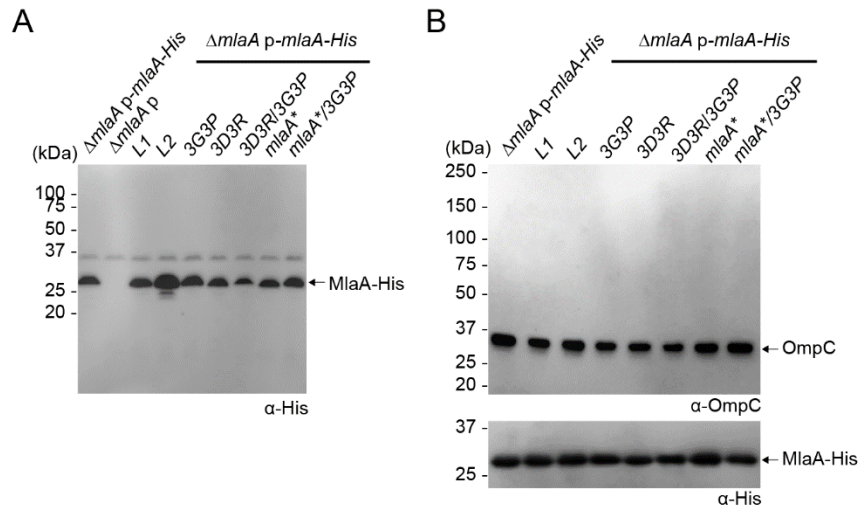

**Figure S11.** Mutations in functional regions of MlaA do not significantly affect protein levels or its interaction with OmpC. (A) Immunoblot showing the levels of indicated MlaA-His variants produced from the pET23/42 vector (p) in the  $\Delta mlaA$  strain. (B) Immunoblots showing OmpC copurified with indicated MlaA-His variants produced from the pET23/42 vector (p) in the  $\Delta mlaA$  strain.

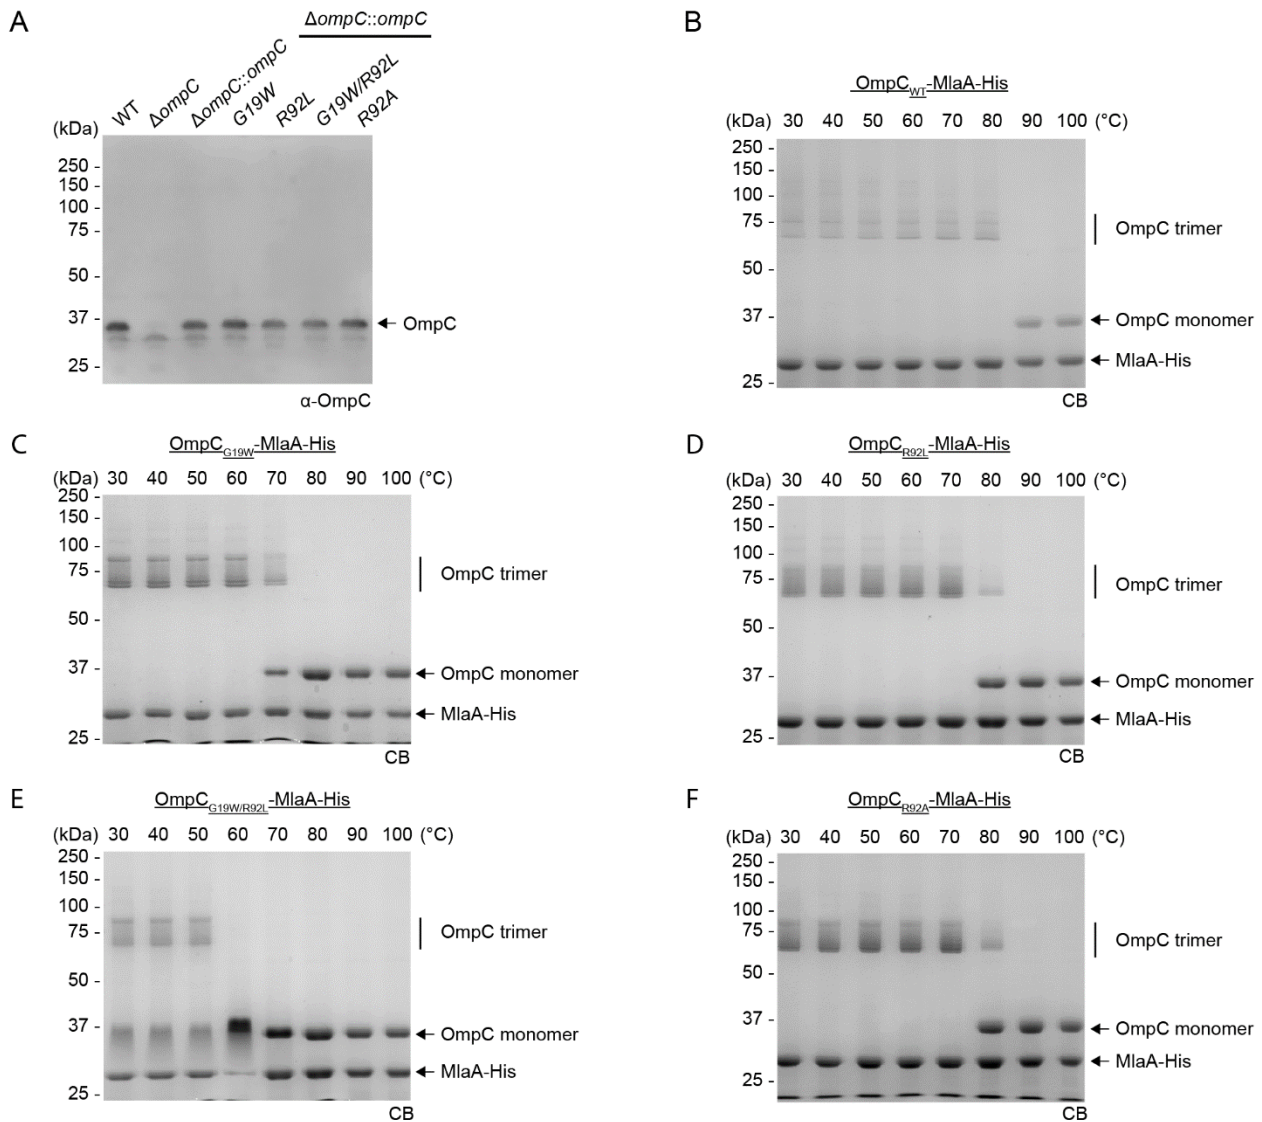

**Figure S12.** Mutations on residues G19 and R92 do not affect OmpC levels in cells, but weaken trimer stability in vitro. (A) Immunoblot showing the levels of wild-type OmpC and indicated OmpC variants produced from the chromosomal locus. (B-F) In vitro temperature titration of purified OmpC-MlaA-His and the indicated variants subjected to semisynthetic SDS-PAGE (12% Tris.HCl gel), followed by Coomassie blue (CB) staining.

## Supplementary Tables

**Table S1. Bacterial strains used in this study**

| <b>Strains</b> | <b>Relevant genotypes and characteristics</b>                                                                      | <b>References</b> |
|----------------|--------------------------------------------------------------------------------------------------------------------|-------------------|
| MC4100         | <i>F- araD139 Δ(argF-lac) U169 rpsL150 relA1 flbB5301 ptsF25 deoC1 ptsF25 thi</i>                                  | (33)              |
| NovaBlue       | <i>endA1 hsdR17 (rK12- mK12+) supE44 thi-1 recA1 gyrA96 relA1 lac F' [proA+ B+ lacIq ZΔM15::Tn10]</i>              | Novagen           |
| BL21(λDE3)     | <i>fhuA2 [lon] ompT gal (λDE3) [dcm] ΔhsdS λDE3 = λ sBamHlo ΔEcoRI-B int:::(lacI::PlacUV5::T7 gene1) i21 Δnin5</i> | Novagen           |
| TKW001         | BL21(λDE3) <i>ΔompF::kan</i>                                                                                       | This study        |
| CZS010         | MC4100 <i>ΔmlaA::kan</i>                                                                                           | (1)               |
| CZS015         | MC4100 <i>ΔompC::kan</i>                                                                                           | (1)               |
| NR1216         | MC4100 <i>ΔdsbA::kan</i>                                                                                           | (34)              |

**Table S2. Plasmids used in this study**

| <b>Plasmids</b>            | <b>Relevant genotypes and characteristics</b>                                                                                                                                                           | <b>References</b> |
|----------------------------|---------------------------------------------------------------------------------------------------------------------------------------------------------------------------------------------------------|-------------------|
| pET22b(+)                  | pT7lac inducible expression vector, contains N-terminal PelB signal peptide for periplasmic localization; Amp <sup>R</sup>                                                                              | Novagen           |
| pET23/42                   | pT7 inducible expression vector, contains multiple cloning site of pET42a(+) in pET23a(+) backbone; Amp <sup>R</sup>                                                                                    | (29)              |
| pSLC-246                   | Template plasmid encoding kanamycin resistance gene for positive selection and toxin gene ( <i>tse2</i> ) under the control of rhamnose inducible promoter (P <sub>rhaB</sub> ) for negative selection. | (2)               |
| pSup-BpaRS-6TRN            | Encodes an orthogonal tRNA and aminoacyl-tRNA synthetase permitting ribosomal incorporation of <i>pBpa</i> at TAG stop codons                                                                           | (5)               |
| pKM208                     | A variation of pKM201 expresses the <i>lacI</i> repressor gene that keep expression of <i>red</i> and <i>gam</i> under tight control prior to IPTG induction                                            | (3)               |
| pACYC184                   | Low copy cloning vector; Cam <sup>R</sup>                                                                                                                                                               | (35)              |
| pCDFDuet-1                 | pT7 inducible expression vector; Spec <sup>R</sup>                                                                                                                                                      | Novagen           |
| pDSW206                    | Promoter down mutations in -35 and -10 of pTrc99a; Amp <sup>R</sup>                                                                                                                                     | (36)              |
| pET23/42 <i>mIaA-His</i>   | Encodes full length MlaA with C-terminal His8 tag; Amp <sup>R</sup> ( <i>p-mIaA-His</i> )                                                                                                               | (1)               |
| pCDF <i>mIaA-His</i>       | Encodes full length MlaA with C-terminal His8 tag; Spec <sup>R</sup>                                                                                                                                    | This study        |
| pCDF- <i>dmlaA-His</i>     | Encodes delipidated version of MlaA (a.a. 19-250) with N-terminal PelB signal peptide (for periplasmic localization) and C-terminal His8 tag; Spec <sup>R</sup>                                         | This study        |
| pET22b(+) <i>dmlaA-His</i> | Encodes delipidated version of MlaA (a.a. 19-250) with N-terminal PelB signal peptide and C-terminal His6 tag; Amp <sup>R</sup>                                                                         | (1)               |
| pACYC184 <i>ompC</i>       | Encodes full length OmpC under its native promoter; Cam <sup>R</sup>                                                                                                                                    | (1)               |
| pDSW206 <i>ompC</i>        | Encodes full length OmpC inducible by <i>lacI</i> promoter; Amp <sup>R</sup>                                                                                                                            | This study        |

**Table S3. Primers used in this study.**

| <b>Primers</b> | <b>Sequence (5' to 3')*</b>                     |
|----------------|-------------------------------------------------|
| ompC_A129B FP  | GGTAACGGCTTCTAGACCTACCGTAACACTGAC               |
| ompC_A129B RP  | GTTACGGTAGGTCTAGAAGCCGTACCACGCTG                |
| ompC_A302B FP  | GTTGATGTTGGTTAGACCTACTACTTCAACAAAAACATGTCC      |
| ompC_A302B RP  | GAAGTAGTAGGTCTAACCAACATCAACATATTTTCAGGATATC     |
| ompC_D7B FP    | GAAGTTTACAACAAATAGGGCAACAAATTAGATCTGTACGG       |
| ompC_D7B RP    | GATCTAATTTGTTGCCCTATTTGTTGTAAACTTCAGCAGCG       |
| ompC_F267B FP  | GCTCAGTACCAGTAGGACTTCGGTCTGCGTCCG               |
| ompC_F267B RP  | CAGACCGAAGTCCTACTGGTACTGAGCAACAGC               |
| ompC_F40B FP   | CCTACATGCGTCTTGGCTAGAAAGGTGAAACTCAGG            |
| ompC_F40B RP   | GTTTCACCTTTCTAGCCAAGACGCATGTAGGTCTGG            |
| ompC_F82B FP   | GGCATTTCGCAGGTCTGAAATAGCAGGATGTGGGTTC           |
| ompC_F82B RP   | GTCGAAAGAACCCACATCCTGCTATTTTCAGACCTGC           |
| ompC_F88B FP   | GATGTGGGTTCTTAGGACTACGGTCGTAACACTACGG           |
| ompC_F88B RP   | ACGACCGTAGTCCTAAGAACCCACATCCTG G                |
| ompC_G138B FP  | CACTGACTTCTTCTAGCTGGTTGACGGCCTGAACTTTGC         |
| ompC_G138B RP  | GGCCGTCAACCAGCTAGAAGAAGTCAGTGTTACGG             |
| ompC_G151B FP  | GTTTCAGTACCAGTAGAAAAACGGCAACCCATCTGGTG          |
| ompC_G151B RP  | GTTGCCGTTTTTCTACTGGTACTGAACAGCAAAGTTC           |
| ompC_G86B FP   | TTC CAG GAT GTGTAGTCT TTC GAC TAC GGT CGT AAC   |
| ompC_G86B RP   | GTAGTCGAAAGACTACACATCCTGGAATTTTCAGACCTGC        |
| ompC_G8B FP    | GAAGTTTACAACAAAGACTAGAACAAATTAGATCTGTACGG       |
| ompC_G8B RP    | GATCTAATTTGTTCTAGTCTTTGTTGTAAACTTAGCAGCG        |
| ompC_K81B FP   | CATTCGCAGGTCTGTAGTTCAGGATGTGGGTTC               |
| ompC_K81B RP   | CACATCCTGGAACTACAGACCTGCGAATGCCACAC             |
| ompC_L143B FP  | CTGGTTGACGGCTAGAACTTTGCTGTTTCAGTACC             |
| ompC_L143B RP  | CAGCAAAGTTCTAGCCGTCAACCAGACCGAAG                |
| ompC_L271B FP  | GTTTCGACTTCGGTTAGCGTCCGTCCCTGGCTTAC             |
| ompC_L271B RP  | CAGGGACGGACGCTAACCGAAGTCGAACTGGTAC              |
| ompC_L275B FP  | GCGTCCGTCCTAGGCTTACCTGCAGTCTAAAG                |
| ompC_L275B RP  | GCAGGTAAGCCTAGGACGGACGCAGACCGAAG                |
| ompC_L340B FP  | AACATCGTAGCTTAGGGTCTGGTTTACCAGTTC               |
| ompC_L340B RP  | GTA AAC CAG ACCCTAAGC TAC GAT GTT ATC AGT GTT G |
| ompC_L50B FP   | G GTT ACT GAC CAGTAGACC GGT TAC GGC CAG TG      |
| ompC_L50B RP   | GCC GTA ACC GGTCTACTG GTC AGT AAC CTG AGT TTC   |
| ompC_L80B FP   | GCA TTC GCA GGTTAGAAA TTC CAG GAT GTG GG        |
| ompC_L80B RP   | CATCCTGGAATTTCTAACCTGCGAATGCCACAC               |
| ompC_M310B FP  | CTTCAACAAAAACTAGTCCACCTACGTTGACTACAAAATC        |
| ompC_M310B RP  | CAACGTAGGTGGACTAGTTTTTGTGTAAGTAGTAGG            |
| ompC_N133B FP  | GCGACCTACCGTTAGACTGACTTCTTCGGTCTG               |
| ompC_N133B RP  | GAAGAAGTCAGTCTAACGGTAGGTCGCGAAGCC               |
| ompC_P273B FP  | CTTCGGTCTGCGTTAGTCCCTGGCTTACCTGCAG              |
| ompC_P273B RP  | GTAAGCCAGGGACTAACGCAGACCGAAGTCGAACTGG           |
| ompC_Q266B FP  | GTTGCTCAGTACTAGTTCGACTTCGGTCTGCGTC              |
| ompC_Q266B RP  | CCGAAGTCGAACTAGTACTGAGCAACAGCTTCG               |
| ompC_Q83B FP   | GGTCTGAAATTCTAGGATGTGGGTTCTTTCGAC               |



ompC\_Q83B RP AGAACCCACATCCTAGAATTTTCAGACCTGCG  
ompC\_Y131B FP CGGCTTCGCGACCTAGCGTAACACTGACTTCTTC  
ompC\_Y131B RP GTCAGTGTTACGCTAGGTCGCGAAGCCGTTACC  
ompC\_Y149B FP CTTTGCTGTTACGTAGCAGGGTAAAAACGGCAAC  
ompC\_Y149B RP GTTTTTACCCTGCTACTGAACAGCAAAGTTCAGGCCG  
ompC\_Y304B FP GTTGGTGCTACCTAGTACTTCAACAAAAACATGTCC  
ompC\_Y304B RP TTTGTTGAAGTACTAGGTAGCACCAACATCAACATATTTTCAG  
ompC\_Y53B FP CCAGCTGACCGGTTAGGGCCAGTGGGAATATC  
ompC\_Y53B RP TCCCACTGGCCCTAACCGGTCAGCTGGTCAGTAAC  
ompC\_Y90B FP GGTTCCTTTCGACTAGGGTTCGTAACACTACGGCG  
ompC\_Y90B RP GTAGTTACGACCCTAGTCGAAAGAACCCACATCCTG

ompC\_NS\_N5 ATGAAAGTTAAAGTACTGTCCCTCCTGGTCCCAGCTCTGCGTGTAG  
GCTGGAGCTGCTTC  
ompC\_NS\_C3 TTAGAACTGGTAAACCAGACCCAGAGCTACGATGTTATCACATATG  
AA TATCCTCCTTAG  
ompC\_NS\_N5\_C ATGAAAGTTAAAGTACTGTCCCTCCTG  
ompC\_NS\_C3\_C TTAGAACTGGTAAACCAGACCCAG

mlaA\_D160A FP TTCACGCTGCGTGCGGACGGTGGTGATATGGCG  
mlaA\_D160A RP ATCACCACCGTCCGCACGCAGCGTGAAGCTACC  
mlaA\_D161A FP CGCTGCGTGATGCGGGTGGTGATATGGCGGATG  
mlaA\_D161A RP CATATCACCACCCGCATCACGCAGCGTGAAGC  
mlaA\_D164A FP GATGACGGTGGTGCGATGGCGGATGGTTTTTAC  
mlaA\_D164A RP ACCATCCGCCATCGCACCCCGTCATCACGCAG  
mlaA\_D167A FP GACGGTGGTGATATGGCGGGCGGGTTTTTACCCG  
mlaA\_D167A RP AAGAACC GGGTAAAAACCCGCCGCCATATCACC  
mlaA\_E188A FP AAATGGACGCTTGCGGGGATCGAAACCCGCGC  
mlaA\_E188A RP GTTTCGATCCCCGCAAGCGTCCATTTACCCAC  
mlaA\_F152A FP GTTCAGTTACCGGCGTACGGTAGCTTCACGCTG  
mlaA\_F152A RP GAAGCTACCGTACGCCGGTAACTGAACGTAAGG  
mlaA\_H131A FP GGACTGAACCTGCGCGCTTCGGTAGTACGCTTG  
mlaA\_H131A RP CTACCGAAGCGCGCAGGTTTCAGTCCGTTGCAG  
mlaA\_N226A FP GATTTTCATCGCTGCGGGCGGGCGAACTCAAACCG  
mlaA\_N226A RP GAGTTCGCCGCCCGCAGCGATGAAATCATGACG  
mlaA\_Q126A FP GAACCCGAAACTGGCGCGGACTGAACCTCACCCG  
mlaA\_Q126A RP GGTTCAGTCCGCGCCAGTTTCGGGTTTCGCCATC  
mlaA\_Q195A FP GAAACCCGCGCTGCGCTGCTGGATTCCGATGG  
mlaA\_Q195A RP GAATCCAGCAGCGCAGCGCGGGTTTCGATCCC  
mlaA\_S155A FP CCGTTCACGGTGCCTTCACGCTGCGTGATGAC  
mlaA\_S155A RP CGCAGCGTGAACGCACCGTAGAACGGTAACTG  
mlaA\_T192A FP GAAGGGATCGAAGCGCGCGCTCAGCTGCTG  
mlaA\_T192A RP CTGAGCGCGCGCTTCGATCCCTTCAAGCGTC  
mlaA\_V182A FP GCCGATGTCTGCGGGTAAATGGACGCTTGAAG  
mlaA\_V182A RP CGTCCATTTACCCGCAGACATCGGCCAGGTCAG

mlaA\_D160R FP TTCACGCTGCGTGCGGACGGTGGTGATATGGCG  
mlaA\_D160R RP ATCACCACCGTCCGCACGCAGCGTGAAGCTACC

mIaA\_D161R FP  
mIaA\_D161R RP  
mIaA\_D164R FP  
mIaA\_D164R RP  
mIaA\_D167R FP  
mIaA\_D167R RP  
mIaA\_D61R FP  
mIaA\_D61R RP  
mIaA\_E188R FP  
mIaA\_E188R RP

CGCTGCGTGATCGCGGTGGTGTATGGCGGATG  
CATATCACCACCGCGATCACGCAGCGTGAAGC  
GATGACGGTGGTCGCATGGCGGATGGTTTTTAC  
ACCATCCGCCATGCGACCACCGTCATCACGCAG  
GACGGTGGTGTATGGCGCGCGGTTTTTACCCG  
AAGAACC GGTA AAAAACC GCGCGCCATATCACC  
GTCGCCTGGCGTCGCTATGTTCCGCAACCGGCG  
TTGCGGAACATAGCGACGCCAGGCGACAGCGAC  
AAATGGACGCTTCGCGGGATCGAAACCCGCGC  
GTTTCGATCCCGCGAAGCGTCCATTTACCCAC

3D3R FP SDM  
3D3R RP SDM  
F<sup>152</sup>YGSF\_to\_5A FP  
F<sup>152</sup>YGSF\_to\_5A RP  
GVGYG\_3G3A\_FP  
GVGYG\_3G3A\_RP  
GVGYG\_3G3P\_FP  
GVGYG\_3G3P\_RP  
mIaA\_P151A FP  
mIaA\_P151A RP  
Y<sup>147</sup>VQL\_to\_4A FP  
Y<sup>147</sup>VQL\_to\_4A RP

CTTCACGCTGCGTCGCCGCGGTGGTCGC ATGGCGGATGGTTTTTACC  
AACCATCCGCCATGCGACCACCGCGGCGACGCAGCGTGAAGCTACCG  
GTTCAGTTACCGGCGGCGGCGGCGGCGACGCTGCGTGTATGACGGTGG  
CATCACGCAGCGTCGCCGCGCCGCGCCGCGGTA ACTGAACGTAAGG  
CTTGGTCATTATGCGGTGGCGTATGCGCCTTACGTTACGTTACCG  
CTGAACGTAAGGCGCATACGCCACCGCATAATGACCAAGCGTAC  
CTTGGTCATTATCCTGTGCCTTATCCTCCTTACGTTACGTTACCG  
CTGAACGTAAGGAGGATAAGGCACAGGATAATGACCAAGCGTAC  
TACGTTACGTTAGCGTTCTACGGTAGCTTCACGCTG  
GCTACCGTAGAACGCTAACTGAACGTAAGGCC  
GGTTATGGGCCTGCGGCGGCGGCGCCGTTCTACGGTAGCTTCAC  
CTACCGTAGAACGCGCGCCGCGCCGCGAGGCCATAAACCACGCC

mIaA\_Y40C FP  
mIaA\_Y40C RP  
mIaA\_D48C FP  
mIaA\_D48C RP  
mIaA\_D92C FP  
mIaA\_D92C RP  
mIaA\_F114C FP  
mIaA\_F114C RP  
mIaA\_F74C FP  
mIaA\_F74C RP  
mIaA\_G227C FP  
mIaA\_G227C RP  
mIaA\_M84C FP  
mIaA\_M84C RP  
mIaA\_P209C FP  
mIaA\_P209C RP  
mIaA\_R193C FP  
mIaA\_R193C RP  
mIaA\_T157C FP  
mIaA\_T157C RP

CAACCGCACCATGTGCAACTTCAACTTCAATG  
AGTTGAAGTTGCACATGGTGGCGTTGAACCC  
CTTCAATGTATTATGCCC GTATATTGTTGACC  
ACAATATACGGGCATAATACATTGAAGTTGAAG  
TAACTACTTCTTGCAGGGC TGC CTTATCAGGGG  
GACCATCCCCTGATAAAGG GCA GCCCTGCAAGAAG  
GGGATGGGCGGT TGCATTGATGTTGCAGGGATG  
GCAACATCAAT GCA ACCGCCATCCCCAAAATGG  
GTTTGAGCAAC TGC ACTGGCAACCTTGAAGAACC  
CAAGGTTGCCAGT GCA GTTGCTCAAACCGTTACG  
TTCATCGCTAATTGCGGCGAACTCAAACCGCAG  
GTTTGAGTTCCCGCAATTAGCGATGAAATCATG  
GAACCTGCGGTG TGC GTTAACTACTTCTTGCAGG  
GAAGTAGTTAAC GCA CACCGCAGGTTCTTCAAGG  
CAGTCGTCCGATTGCTATATTATGGTGCGCGAAG  
GCACCATAATATAGCAATCGGACGACTGACGCAG  
GGGATCGAAACCTGCGCTCAGCTGCTGGATTCC  
CAGCAGCTGAGCGCAGGTTTCGATCCCTTCAAGC  
CTACGGTAGCTTCTGCTGCGTGTATGACGGTGG  
TCATCACGCAG GCAGAAGCTACCGTAGAACGG

pCDFDuet-  
1\_pelB\_mIaA\_Chis  
NdeI\_Fwd

CGCT CAT ATG AAA TAC CTG CTG CCG ACC GCT GCT GC

pCDFDuet-1\_FL\_mlaA\_Chis NdeI\_Fwd CGCT CAT ATG AAG CTT CGC CTG TCG

pCDFDuet-1\_mlaA\_AvrII Rev AGAT CCT AGG TCA GTG GTG GTG GTG GTG GTG CTC GAG

pDSW206\_ompC\_NcoI Fwd CGAT CC ATG GCA AAA GTT AAA GTA CTG TCC CTC C

pDSW206\_ompC\_HindII Rev CGCT AAG CTT TTA GAA CTG GTA AAC CAG ACC CAG AGC

---
